# Supplementary material for: Genome-wide whole-blood transcriptome profiling across inherited bone marrow failure subtypes
Source: PubMed Central journal article supplement — Blood Adv. 2021 Dec 9;5(23):5360–71. doi: 10.1182/bloodadvances.2021005360 (PMC9153011; doi:10.1182/bloodadvances.2021005360), 2021-12-09
Supplement: advancesADV2021005360-suppl5.pdf [file advancesADV2021005360-suppl5.pdf]

## Supplementary Information

### Further information regarding patient selection and controls

The control samples were obtained from healthy members of staff at The Royal London Hospital during the same time collection of samples from the cases was being undertaken. It was not possible to obtain blood counts on these controls. The age range of these control individuals was 22-63 years and there was a female to male ratio of 2:1.

For the characterised patient groups, all cases underwent a chromosomal breakage test and only those that were found to have a mutation in either *FANCA* or *FANCG* gave a positive result. The disease-causing mutations in these cases were identified by screening with an in-house custom capture targeted exon panel containing 111 disease genes (Supplemental Table 2). Sanger sequencing confirmed the mutation. Characterisation of the DKC1 and SDS patients was initially based on the clinical presentation. Targeted Sanger sequencing of *DKC1* or *SBDS* respectively, identified the underlying genetic cause.

The uncharacterised/unsolved cases were selected for inclusion in the study based on their initial clinical presentation. All cases were under the clinical care of the same haematologist. All were negative for the chromosomal breakage test ruling out FA. The grouping of these cases is based on their clinical presentation and related blood counts. While it is accepted that this may not be the most reliable way of grouping these samples, it is logical that for uncharacterised bone marrow failure cases matching by blood counts in the first instance makes the most sense with the caveat that the underlying genetic cause may be different<sup>1</sup>. All cases were also screened for potential disease-causing variants by using the in-house candidate gene custom capture panel containing 111 genes that are associated with known bone marrow failure. No potentially pathogenic variants were detected by this panel. Further work needs to be undertaken to elucidate the underlying genetic variant(s) in these cases.

### RNA sequencing is highly reproducible between batches

RNA-sequencing analysis was performed on a group of three patients with genetically characterised FA and three unrelated healthy controls. This was performed in duplicate to assess the reproducibility of the experiment (analysis: FANC and FANC.1). Differential expression analysis of the FANC data set showed there were 875 dysregulated genes with a False discovery rate (FDR) <0.05 and of these 710 were up regulated and 165 were down regulated. For the FANC.1 experiment the numbers of dysregulated genes were 804, 615 and 189, respectively. This is also seen in the volcano plots showing a skewing to up regulation in these experiments (Supplemental Figure 1A and 1B). A plot of the log<sub>2</sub> fold change of FANC against FANC.1 showed very similar levels of dysregulation, with a correlation of R<sup>2</sup> = 0.94 (Supplemental Figure 1C). To validate the data, we selected a small subset of genes for analysis by qPCR. After normalising the expression to three control genes, we confirmed the relative levels in the patients were as predicted by the RNAseq results. Fold change detected by qPCR from total RNA correlated very well with the fold change recorded in mRNA by RNAseq for the significantly dysregulated genes (Supplemental Figure 1D). These data demonstrate that batch has little effect on the reproducibility of the data. Where possible sample libraries were prepared and run in the same batch thus further minimising variability.

### **Additional reference**

1. Blombery P, Fox L, Ryland GL, Thompson ER, Lickiss J, McBean M, et al. Utility of clinical comprehensive genomic characterization for diagnostic categorization in patients presenting with hypocellular bone marrow failure syndromes. *Haematologica*. 2021;106(1):64-73.

**Supplementary Tables:**

Supplemental Table 1 – Blood counts for the patients enrolled in the study.

Supplemental Table 2 – List of genes included in the in-house bone marrow failure targeted gene panel.

Supplemental Table 3 – DESeq2 analysis data for all patient groups (FANC, SBDS, DKC1, TRI and SNGL (Excel spread sheet with multiple tabs)

Supplemental Table 4 – GSEA analysis of all comparisons detailing all the positively and negatively enriched gene sets with a cut off FWER q-val <0.05. (Excel spread sheet)

Supplemental Table 5 – Shared significantly up regulated genes as identified by 3-way and 5-way Venn diagrams.

Supplemental Table 6 – Shared and gene specific dysregulated gene lists for the intersection of up and down regulated genes. (Excel spread sheet)

Supplemental Table 7 – Panther analysis of shared and gene-specific dysregulated genes (Excel spread sheet with multiple tabs)

**Supplementary Figures:**

Supplemental Figure 1 - Reproducible dysregulation of gene expression in Fanconi anemia demonstrating minimal batch variability.

Supplemental Figure 2 – Comparison of overall gene expression as determined by DESeq2 analysis as a measure of Fold change and False discovery rate (FDR)

Supplemental Figure 3 – 2D PCA plots showing cases v controls for FANC, DKC1 and SBDS.

**Supplemental Table 1 - Blood counts on patients enrolled in this study.**

| ID   | Group | Hb (M: 13-17; F: 12-16 g/dl) | WCC (4-11 x10 <sup>9</sup> /l) | Platelets (150-410 x10 <sup>9</sup> /l) | Neutrophils (2-7 X10 <sup>9</sup> /l) | Lymphocytes (1-3 X10 <sup>9</sup> /l) | Mono-cytes (0.2-1 X10 <sup>9</sup> /l) | Eosino-phils (0-0.5 X10 <sup>9</sup> /l) | CD3+ T cells (918-2023 X10 <sup>6</sup> /l) | CD4+ T cells (455-1320 X10 <sup>6</sup> /l) | CD8+ T cells (140-906 X10 <sup>6</sup> /l) | CD19+ B cells (42-461 X10 <sup>6</sup> /l) | CD56+ NK cells (90-600 X10 <sup>6</sup> /l) |
|------|-------|------------------------------|--------------------------------|-----------------------------------------|---------------------------------------|---------------------------------------|----------------------------------------|------------------------------------------|---------------------------------------------|---------------------------------------------|--------------------------------------------|--------------------------------------------|---------------------------------------------|
| 4457 | FANC  | 14.4                         | <b>2.9</b>                     | 207                                     | <b>1.7</b>                            | <b>0.5</b>                            | 0.6                                    | 0.2                                      | <b>679</b>                                  | <b>217</b>                                  | 467                                        | <b>1</b>                                   | 160                                         |
| 4462 | FANC  | 12.6                         | <b>2.4</b>                     | 177                                     | <b>1.4</b>                            | <b>0.9</b>                            | <b>0.1</b>                             | 0                                        | 970                                         | <b>358</b>                                  | 615                                        | <b>1</b>                                   | <b>33</b>                                   |
| 4501 | FANC  | 13.5                         | <b>2.7</b>                     | 161                                     | <b>0.9</b>                            | 1.3                                   | 0.3                                    | 0.2                                      | 1115                                        | 549                                         | 532                                        | <b>1</b>                                   | 257                                         |
| 4705 | DKC1  | 13.6                         | 6.2                            | 189                                     | 3.3                                   | 1.9                                   | 0.8                                    | 0.1                                      | 1323                                        | 627                                         | 520                                        | 315                                        | 294                                         |
| 4740 | DKC1  | 14.6                         | 7.5                            | <b>84</b>                               | 2.3                                   | <b>4.3</b>                            | 0.7                                    | 0.1                                      | <b>4150</b>                                 | <b>1527</b>                                 | <b>2549</b>                                | 74                                         | 279                                         |
| 4702 | DKC1  | 15.1                         | 9.3                            | 279                                     | 6.2                                   | 2.0                                   | 0.8                                    | 0.2                                      | 1430                                        | 704                                         | 704                                        | 243                                        | 406                                         |
| 4551 | SBDS  | 14.2                         | <b>2.2</b>                     | <b>103</b>                              | <b>0.8</b>                            | 1.1                                   | 0.4                                    | 0                                        | <b>832</b>                                  | <b>446</b>                                  | 386                                        | <b>35</b>                                  | 164                                         |
| 4575 | SBDS  | 14.6                         | <b>2.6</b>                     | <b>141</b>                              | <b>1.1</b>                            | 1.3                                   | 0.2                                    | 0                                        | 1078                                        | 737                                         | 328                                        | 63                                         | <b>85</b>                                   |
| 4642 | SBDS  | 14.0                         | <b>2.1</b>                     | <b>101</b>                              | <b>0.7</b>                            | 1.1                                   | 0.3                                    | 0                                        | <b>836</b>                                  | <b>429</b>                                  | 371                                        | 179                                        | 196                                         |
| 4504 | TRI   | <b>8.3</b>                   | <b>2.6</b>                     | <b>109</b>                              | <b>1.6</b>                            | <b>0.6</b>                            | 0.2                                    | 0.2                                      | <b>381</b>                                  | <b>231</b>                                  | 153                                        | 89                                         | <b>74</b>                                   |
| 4545 | TRI   | <b>7.5</b>                   | <b>2.0</b>                     | <b>48</b>                               | <b>0.6</b>                            | 1.2                                   | 0.2                                    | 0.1                                      | 1091                                        | 572                                         | 532                                        | <b>39</b>                                  | <b>68</b>                                   |
| 4592 | TRI   | <b>7.9</b>                   | <b>2.1</b>                     | <b>9</b>                                | <b>0.6</b>                            | 1.3                                   | 0.2                                    | 0                                        | -                                           | -                                           | -                                          | -                                          | -                                           |
| 4520 | SNGL  | <b>10.7</b>                  | 6.7                            | 410                                     | 4.2                                   | 1.7                                   | 0.5                                    | 0.3                                      | 1998                                        | 725                                         | 417                                        | 260                                        | 273                                         |
| 4633 | SNGL  | 14.2                         | <b>3.5</b>                     | 197                                     | <b>1.9</b>                            | 1.2                                   | 0.3                                    | 0                                        | 1187                                        | 847                                         | 333                                        | 154                                        | <b>71</b>                                   |
| 4680 | SNGL  | 13.1                         | <b>2.3</b>                     | 289                                     | <b>1.4</b>                            | <b>0.6</b>                            | 0.2                                    | 0                                        | <b>410</b>                                  | <b>319</b>                                  | <b>108</b>                                 | 132                                        | <b>79</b>                                   |

Normal ranges are given in brackets. M – males, F- females. Abnormal values are in bold (underlined bold is higher than normal). For 4740 the high T-lymphocyte count gives a low B cell percentage/ratio. – data not available

**Supplemental Table 2 – List of genes included on the in-house candidate gene screening panel.**

|          |         |        |        |        |        |
|----------|---------|--------|--------|--------|--------|
| ACD      | EFL1    | GATA1  | PALB2  | RPS10  | STN1   |
| ADA2     | ELANE   | GATA2  | PARN   | RPS17  | TAZ    |
| ANKRD26  | ERBB3   | GFI1   | POLA1  | RPS19  | TERC   |
| BRCA1    | ERCC4   | GRHL2  | POT1   | RPS24  | TERT   |
| BRCA2    | ERCC6L2 | HAX1   | RAD51  | RPS26  | THPO   |
| BRIP1    | ETV6    | HOXA11 | RAD51C | RPS27  | TINF2  |
| C15orf41 | FANCA   | JAGN1  | RBM8A  | RPS28  | TP53   |
| CDAN1    | FANCB   | KIF23  | RECQL4 | RPS29  | TYMS   |
| CEBPA    | FANCC   | KLF1   | RFWD3  | RPS7   | UBE2T  |
| CSF3R    | FANCD2  | LIG4   | RMRP   | RTEL1  | USB1   |
| CTC1     | FANCE   | LPIN2  | RPL11  | RUNX1  | VPS45  |
| CXCR4    | FANCF   | MAD2L2 | RPL15  | SAMD9  | WAS    |
| CYCS     | FANCG   | MECOM  | RPL18  | SAMD9L | WRAP53 |
| DCLRE1B  | FANCI   | MPL    | RPL26  | SBDS   | XRCC2  |
| DDX41    | FANCL   | MYSM1  | RPL27  | SEC23B | ZCCHC8 |
| DKC1     | FANCM   | NAF1   | RPL31  | SHQ1   |        |
| DNAJC21  | FYB1    | NHP2   | RPL35A | SLX4   |        |
| DNAJC3   | G6PC    | NOP10  | RPL5   | SP1    |        |
| DUT      | G6PC3   | NPM1   | RPL9   | SRP54  |        |

**Supplemental Table 5 – Shared significantly up regulated genes as identified by 3-way and 5-way Venn diagrams.**

| <b>HUGO</b>     | <b>Name</b>                                        | <b>Relevant biological function*</b>              | <b>Key process</b>   |
|-----------------|----------------------------------------------------|---------------------------------------------------|----------------------|
| <b>ANXA1</b>    | Annexin A1                                         | inflammatory process                              | inflammation         |
| ATP5MG          | ATP synthase subunit g, mitochondrial              | ATP synthesis                                     | mitochondrion        |
| COX7C           | Cytochrome c oxidase subunit 7C, mitochondrial     | mitochondrial, oxidase                            | mitochondrion        |
| <b>HP</b>       | Haptoglobin                                        | haemoglobin binding                               | acute-phase response |
| <b>HSP90AA1</b> | Heat shock protein HSP 90-alpha                    | molecular chaperone                               | stress response      |
| MYL6            | Myosin light polypeptide 6                         | actin family cytoskeletal protein, calmodulin     | muscle protein       |
| RBX1            | E3 ubiquitin-protein ligase RBX1                   | ubiquitin-protein ligase                          | ubiquitination       |
| <b>RETN</b>     | Resistin                                           | promotes chemotaxis in myeloid cells              | neutrophil           |
| RPL7            | 60S ribosomal protein L7                           | ribosomal protein                                 | translation          |
| RPL9            | 60S ribosomal protein L9                           | ribosomal protein                                 | translation          |
| RPL11           | 60S ribosomal protein L11                          | ribosomal protein                                 | translation          |
| RPL21           | 60S ribosomal protein L21                          | ribosomal protein                                 | translation          |
| RPL23           | 60S ribosomal protein L23                          | ribosomal protein                                 | translation          |
| RPL26           | 60S ribosomal protein L26                          | ribosomal protein                                 | translation          |
| RPL31           | 60S ribosomal protein L31                          | ribosomal protein                                 | translation          |
| RPL41           | 60S ribosomal protein L41                          | ribosomal protein                                 | translation          |
| RPS3A           | 40S ribosomal protein S3a                          | ribosomal protein, cysteine protease              | translation          |
| RPL21P16        | ribosomal protein L21 pseudogene 16                | n/a                                               | n/a                  |
| S100A8          | Protein S100-A8                                    | calmodulin, signalling molecule                   | signalling           |
| SELENOK         | Selenoprotein K                                    | T-cell proliferation                              | other                |
| SERF2           | Small EDRK-rich factor 2                           | amyloid protein aggregation                       | other                |
| TMA7            | Translation machinery-associated protein 7         | cytoplasmic translation                           | translation          |
| TOMM7           | Mitochondrial import receptor subunit TOM7 homolog | protein targeting to mitochondrion                | mitochondrion        |
| TPT1            | Translationally controlled tumour protein          | non-motor microtubule binding protein             | other                |
| TXN             | Thioredoxin                                        | mitochondrial reactive oxygen species homeostasis | mitochondrion        |
| UQCR11          | Cytochrome b-c1 complex subunit 10                 | part of the mitochondrial respiratory chain       | mitochondrion        |

Listing relevant biological function as described by Uniprot\* and the key process. Genes highlighted in red are only present in the intersection of upregulated genes from FANC DKC1 and SBDS.

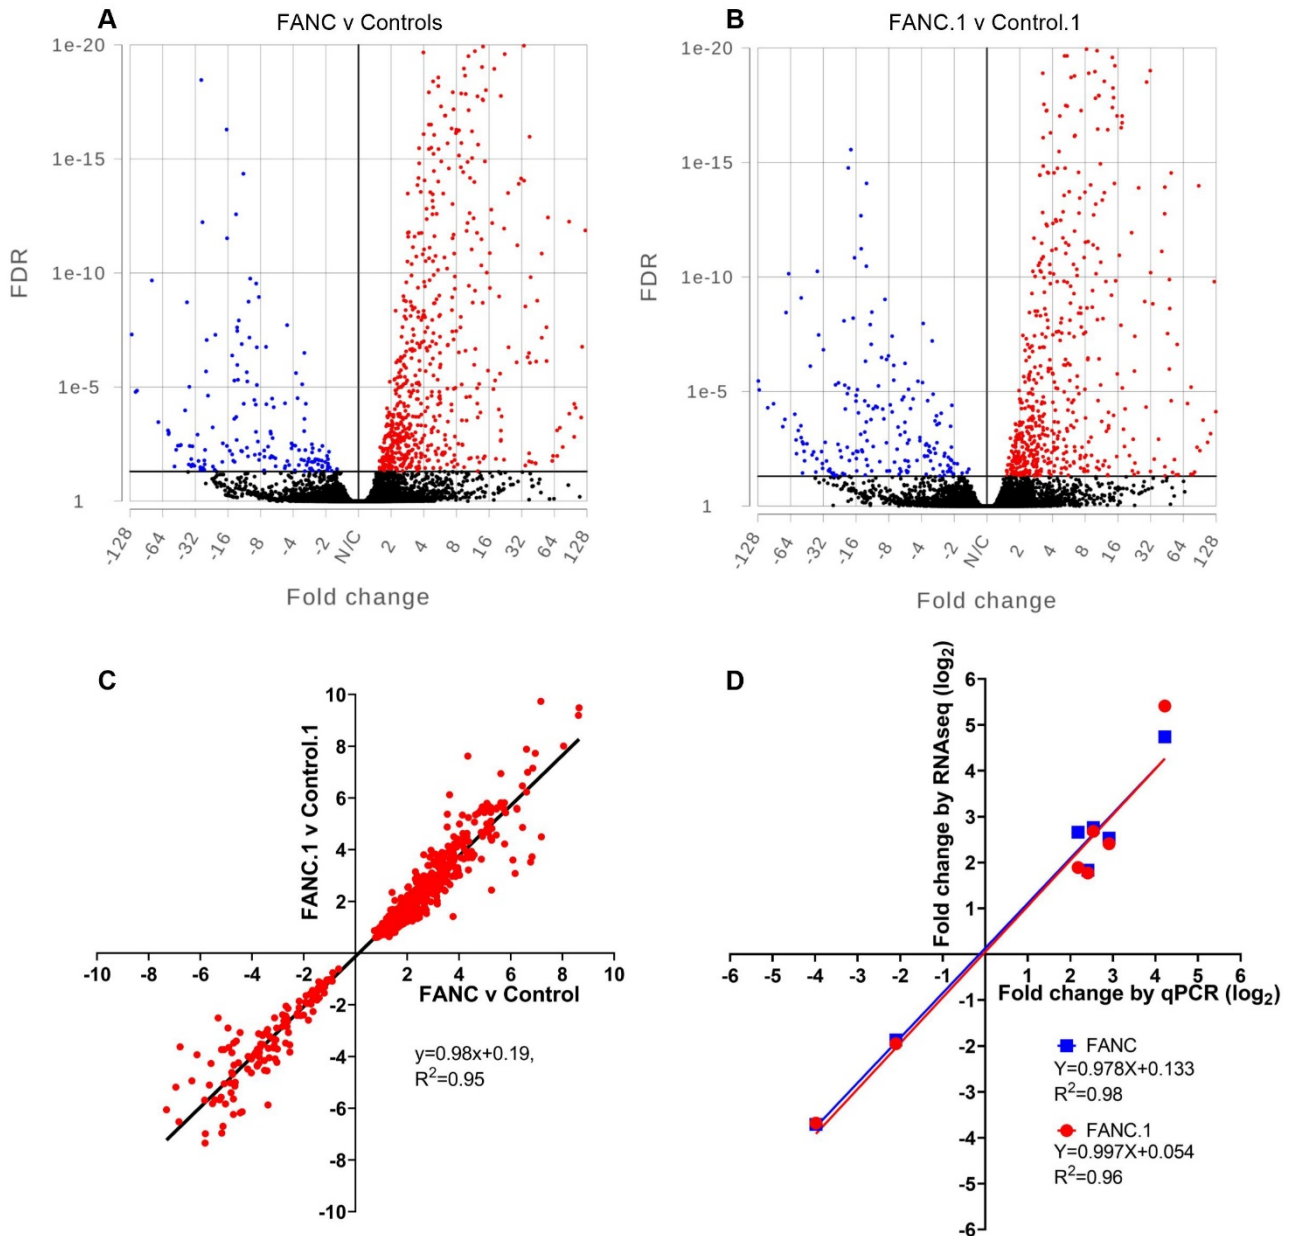

**Supplemental Figure 1 – Reproducible dysregulation of gene expression in Fanconi anemia demonstrating minimal batch variability. A and B** Volcano plots showing a similar pattern of dysregulation between the duplicate experiments (FDR<0.05, red -upregulated genes, blue-down regulated genes). **C.** Scatter plot of the fold changes observed for the shared dysregulated genes shows good reproducibility. **D.** Scatter plot of log<sub>2</sub> fold change determined by qPCR compared with RNA-seq data from two FANC experiments.

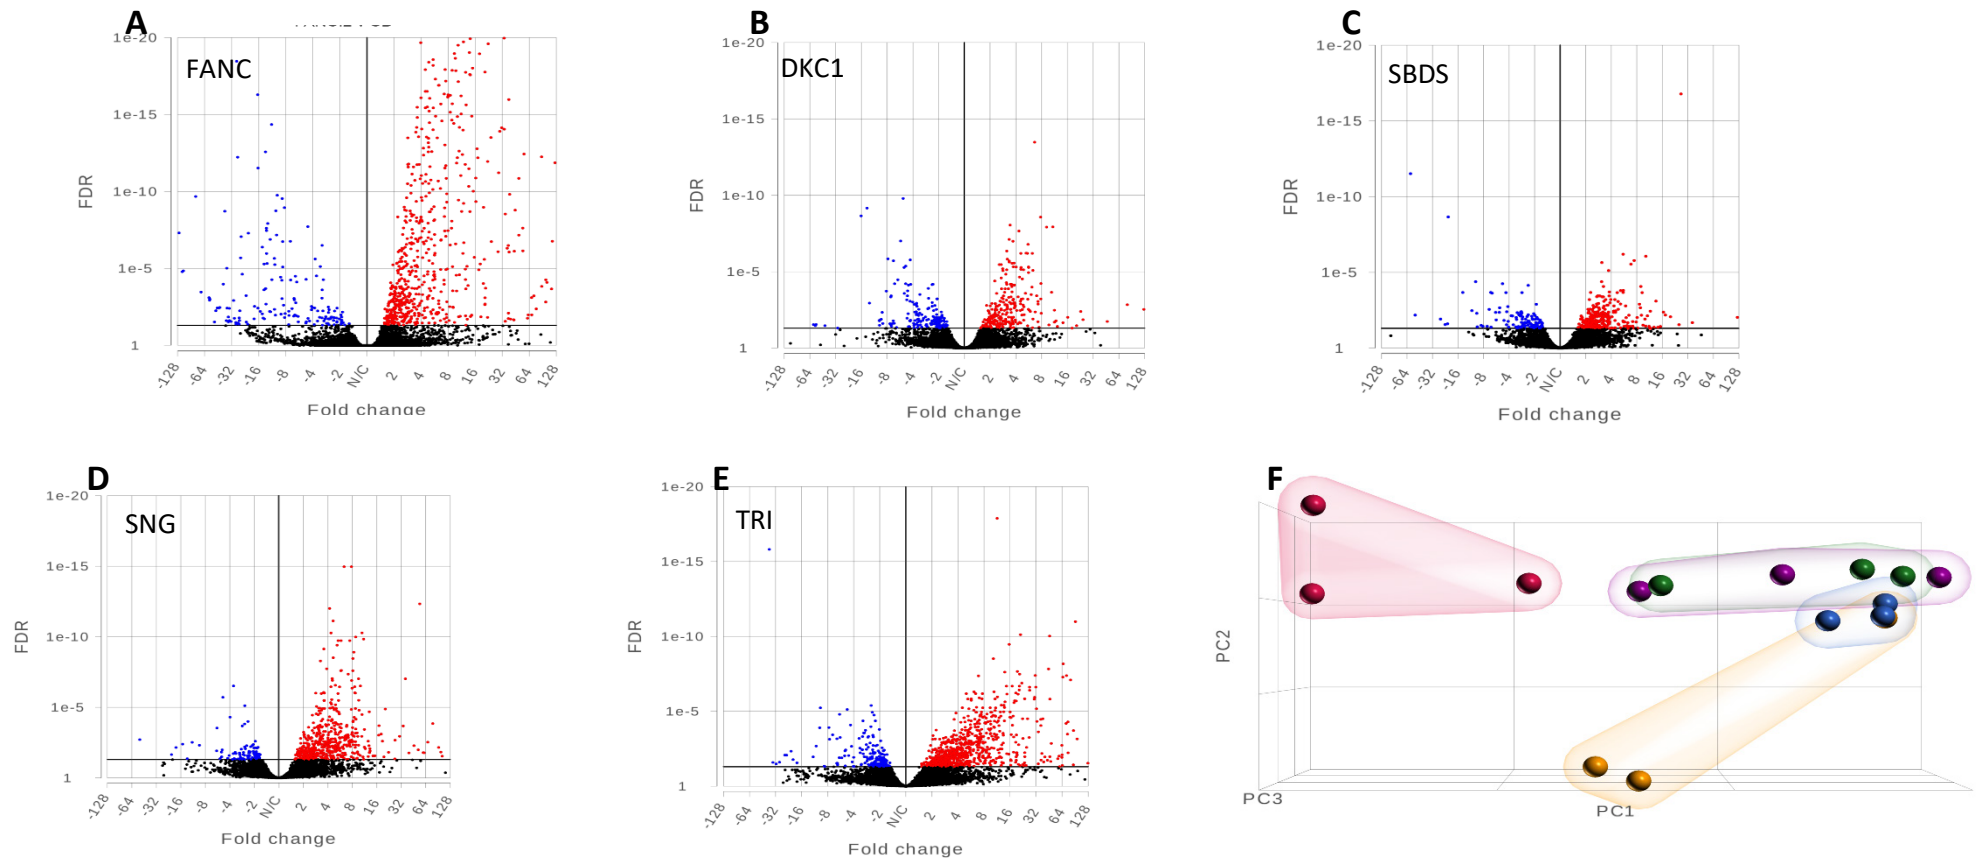

**Supplemental Figure 2 – Comparison of overall gene expression as determined by DESeq2 analysis as a measure of Fold change and False discovery rate (FDR)** A-E- Volcano plots of the patient groups included in this study showing differential gene expression when compared with healthy controls. For clarity scales are set the same so some points may be omitted from the plot. Each point represents a gene. red - up regulated genes, blue – down regulated genes (all at  $FDR < 0.05$ ) black – genes that fail to meet the  $FDR < 0.05$  threshold. F – PCA plot showing all the patient used in this study (blue-FANC cases, red-DKC1 cases, yellow-SBDS cases, green-TRI cases, purple – SNGL cases).



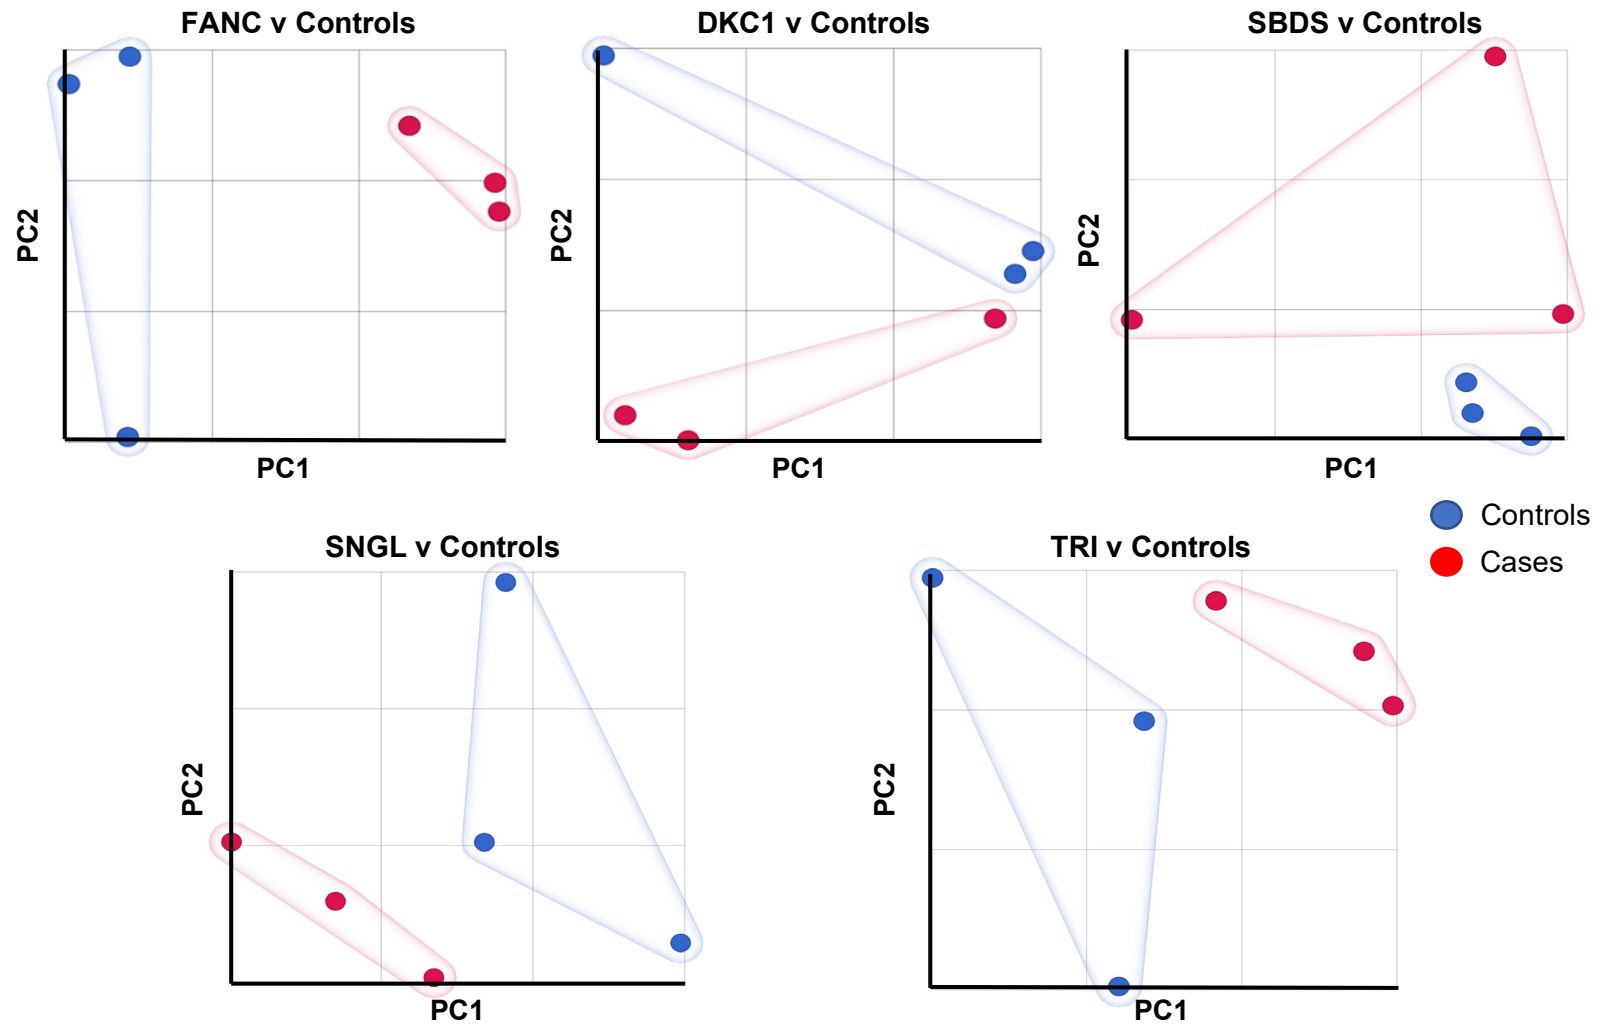

**Supplemental Figure 3 – 2D PCA plots showing cases v controls for all groups of cases in this study.** In each case the red circles represent the cases and the blue circles the controls
